# Supplementary material
Source: Springer Nature journal article supplement (https://www.springermedizin.de/resource/supplementary/12884_2008_205_MOESM1_ESM.pdf/9459956)

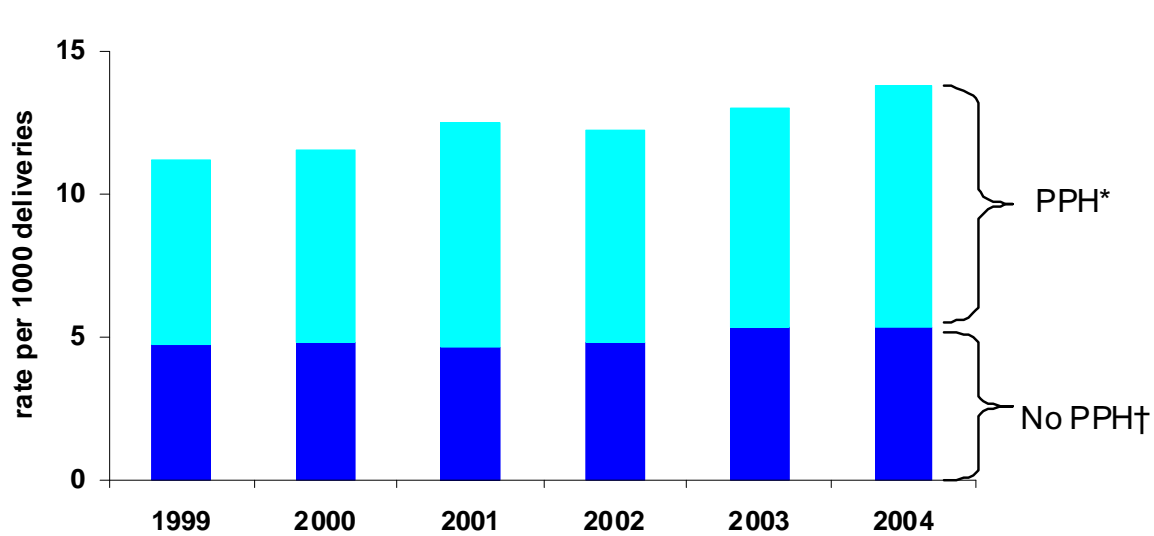

Supplement: MOESM1 [file 9459956]
